# Supplementary material for: Fabrication of 3D hexagonal bottle-like Si–SnO2 core–shell nanorod arrays as anode material in on chip micro-lithium-ion-batteries
Source: Royal Society of Chemistry journal article supplement (doi:10.1039/c3ta10601b), 2013-01-01
Supplement: c3ta10601b.pdf [file c3ta10601b.pdf]

## Supporting Information

### Supplementary figures

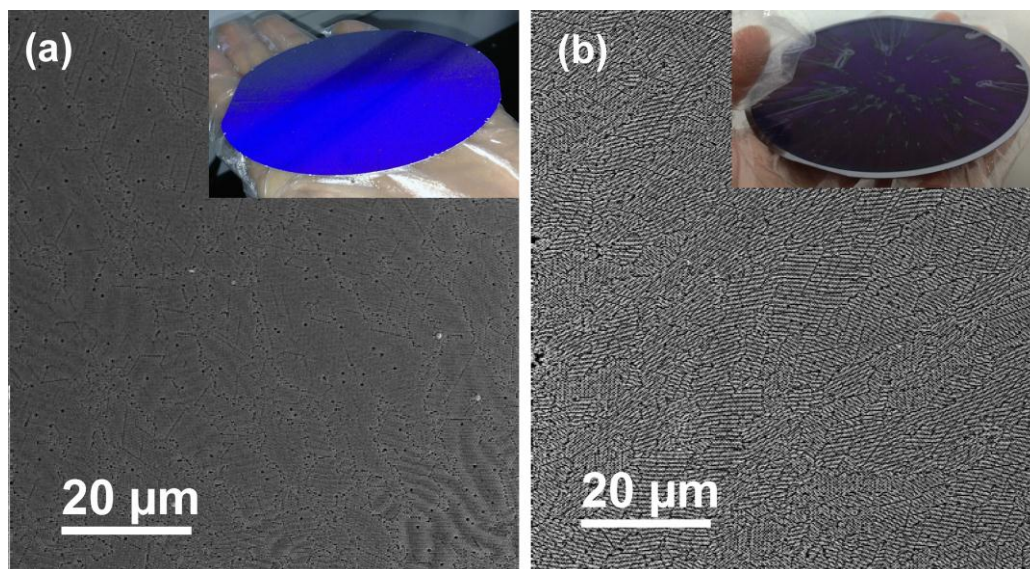

**Supplementary Figure S1.** Wafer scale monolayer PS nanosphere templates and Si NR arrays can be successfully fabricated using the spin-coating method: **(a)** The SEM images of the as-fabricated PS template by assembling the 300-nm-diameter PS nanospheres and the inset-photograph of the self-assembled PS nanospheres monolayer on a 4 inch silicon wafer; **(b)** The SEM images of the as-fabricated Si NR arrays using the NSL combined ICP etching method and the inset-photograph of the fabricated Si NR arrays on the 4 inch silicon substrate by employing the PS template of **(a)**;

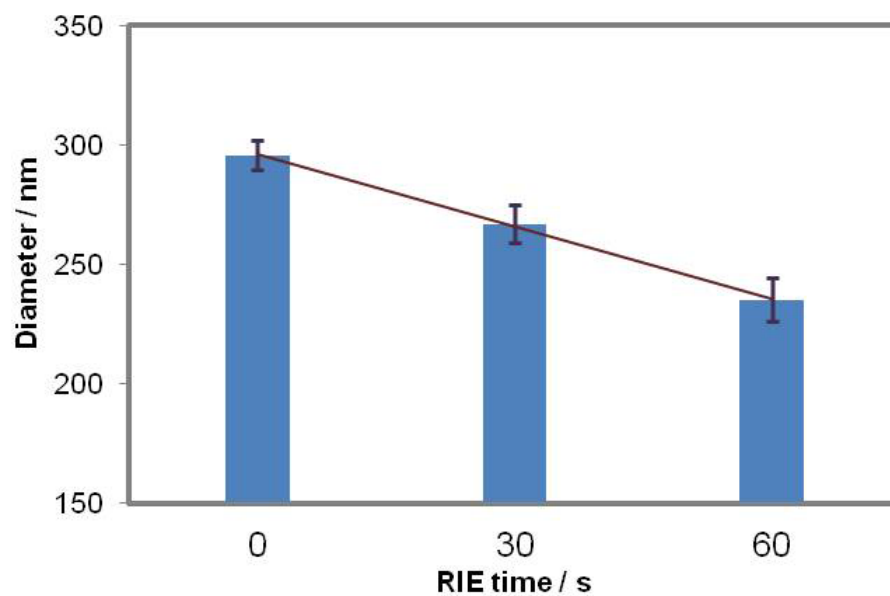

**Supplementary Figure S2.** The average diameters of PS nanospheres were manipulated linearly by O<sub>2</sub> plasma etching for 0, 30 and 60 s, respectively.

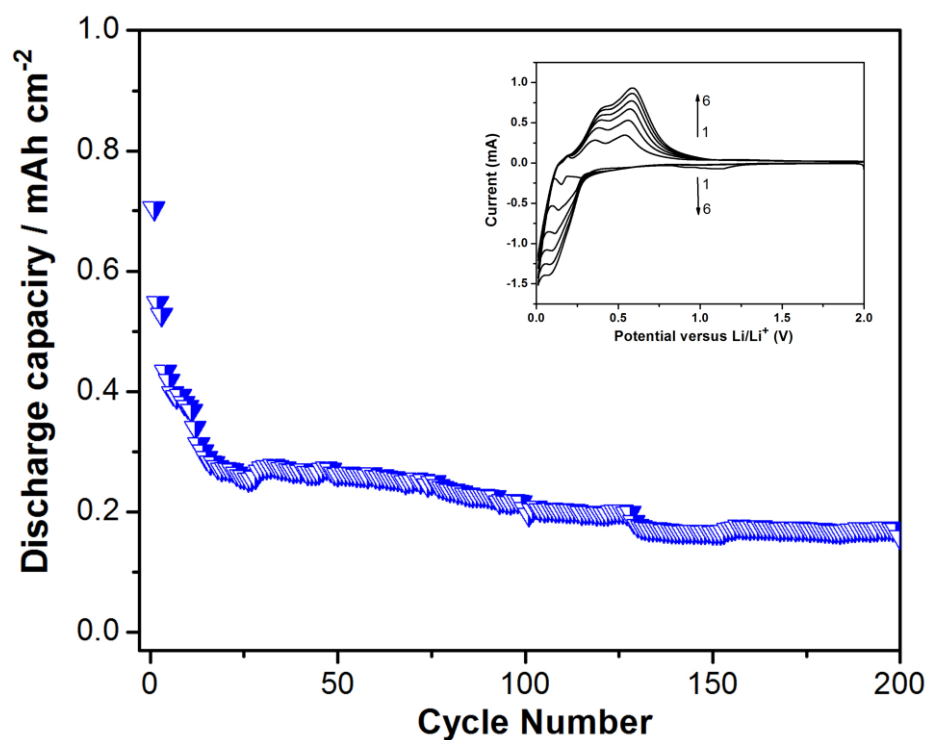

**Supplementary Figure S3.** The capacity retention of the Si/SnO<sub>2</sub> NR composite electrode at a current density of 500  $\mu\text{A cm}^{-2}$  after the CV measurement of six cycles.

The CV measurement of the first cycles within the voltage window between 0.01 and 2.0 V vs.  $\text{Li/Li}^+$  can act as the activation process. It is clear that the discharge capacity (Li-ion insertion) during the first 20 cycles decreases rapidly, and then reaches to a relatively stable state. After 200 cycles, the discharge capacity still can be maintained at about 0.2  $\text{mAh cm}^{-2}$ .

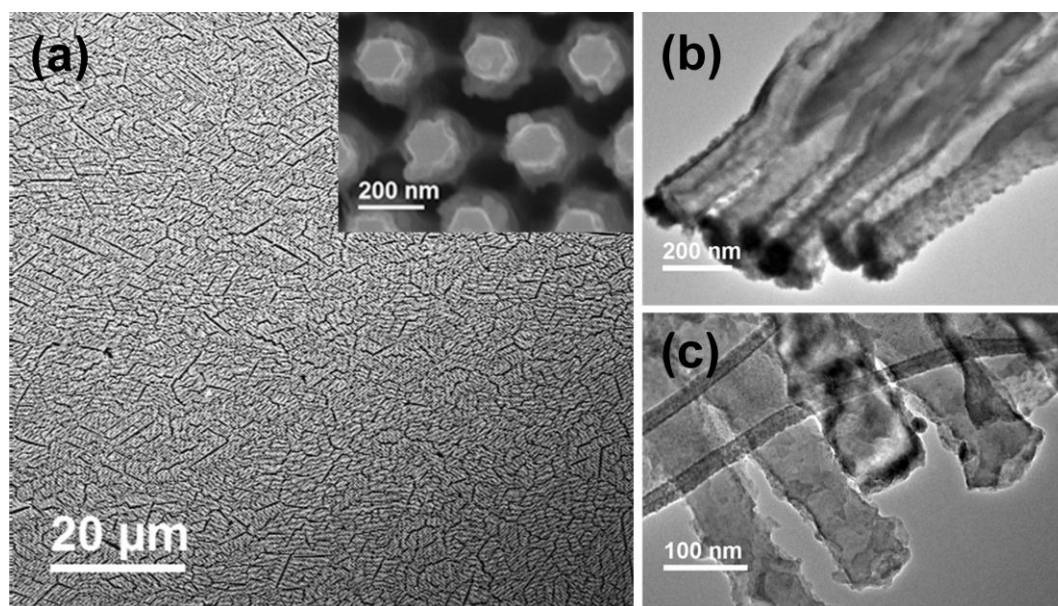

**Supplementary Figure S4.** (a) SEM images of Si/SnO<sub>2</sub> NR composite electrode in a large area after 200 cycles at a current density of 500 μA cm<sup>-2</sup> within the voltage window from 0.1 to 2.0 V vs. Li/Li<sup>+</sup> and its high magnification morphology with the volume expansion of the active material as in the inset; the corresponding TEM images of (b) the Si/SnO<sub>2</sub> NR composite arrays remaining the bottle-like structures and (c) minor peeling-off phenomena on the Si/SnO<sub>2</sub> NR surface induced by the cycling processes.
